# Supplementary material for: Inhibition of effector B cells by ibrutinib in systemic sclerosis
Source: Springer Nature journal article supplement (doi:10.1186/s13075-020-02153-8), 2020-03-30
Supplement: MOESM1 [file 17845014]

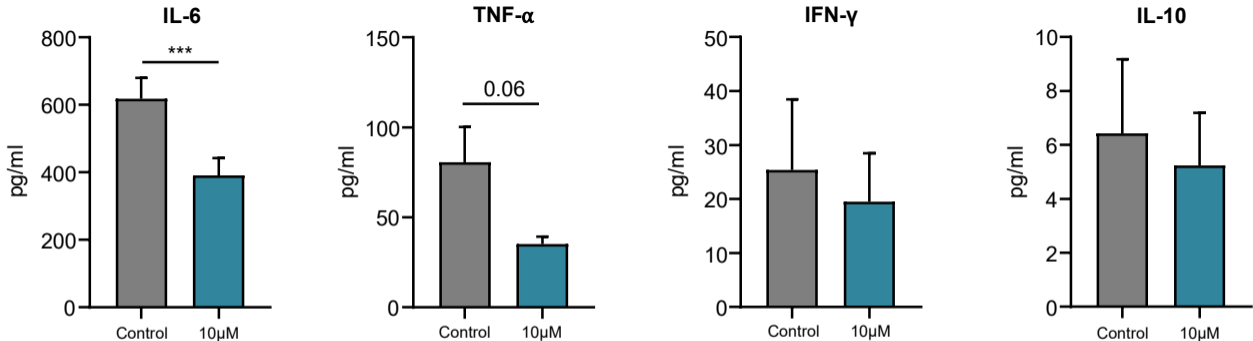

**Supplemental figure 1: Cytokine production by B cells of healthy volunteers with ibrutinib treatment (n=4)**

B cells of healthy volunteers were stimulated with CpG for 24h and treated with DMSO (Control) or ibrutinib (10 $\mu$ M). With a Legendplex assay, cytokine levels of IL-6, TNF- $\alpha$ , IFN- $\gamma$  and IL-10 were determined in the culture supernatant. Bars represent mean. Error bars indicate SEM. \*  $p < 0.05$ , \*\*  $p < 0.01$ , \*\*\*  $p < 0.001$ .
